# Supplementary material for: Construction of an anthropometric discriminant model for identification of elite swimmers: an adaptive lasso approach
Source: PeerJ. 2023 Jan 9;11:e14635. doi: 10.7717/peerj.14635 (PMC9835708; doi:10.7717/peerj.14635)
Supplement: Supplemental Information 6 — Three worksheets: the worksheet named “whole sample” provides automatic calculation of success probabilities based on the prediction model for the whole sample; the worksheet named “male” provides automatic calculation of success probabilities based on the prediction model for male swimmers ; the worksheet named “female” provides automatic calculation of success probabilities based on the prediction model for female swimmers. The probability of becoming an elite swimmer can be automatically calculated by entering data for the selected variables. [file peerj-11-14635-s006.xlsx]

## Sheet: whole sample
	Information / Measurements	Units	Values
	Age of attaining the highest level	year	21.59
	Gender		1
	Upper limb length	cm	74.8
	Hand breadth	cm	7.8
	Hand length	cm	17.5
	Acromion height	cm	140.9
	Iliospinale posterior height	cm	91.8
	Trochanterion height	cm	87.4
	Eristailiaca height	cm	99.2
	Biacromial breadth	cm	43.8
	Bitrochanteric breadth	cm	33.4
	Head circumference	cm	56.5
	Chest circumference	cm	94.6
	Waist circumference	cm	75.5
	Hip circumference	cm	92
	Maximum biceps circumference	cm	32.3
	Minimum biceps circumference	cm	31.2
	Skeletal muscle mass	kg	30.9
	Probability of being an elite swimmer		0.908239
	Note:
	Gender: 0=male; 1=female

## Sheet: male
	Information / Measurements	Units	Values
	Stature	cm	191.1
	Upper limb length	cm	85.7
	Acromion height	cm	157
	Iliospinale posterior height	cm	104.7
	Trochanterion height	cm	97.2
	Eristailiaca height	cm	111.3
	Head circumference	cm	56.5
	Chest circumference	cm	103.5
	Waist circumference	cm	81.9
	Hip circumference	cm	95.4
	Maximum biceps circumference	cm	34.6
	Minimum biceps circumference	cm	32.1
	Skeletal muscle mass	kg	42.3
	Probability of being an elite swimmer		0.99651

## Sheet: female
	Information / Measurements	Units	Values
	Stature	cm	173.1
	Upper limb length	cm	74.8
	Acromion height	cm	140.9
	Iliospinale posterior height	cm	91.8
	Trochanterion height	cm	87.4
	Head circumference	cm	56.5
	Chest circumference	cm	94.6
	Waist circumference	cm	75.5
	Hip circumference	cm	92
	Skeletal muscle mass	kg	30.9
	Body fat percentage	%	19.6
	Probability of being an elite swimmer		0.909095
